# Supplementary material for: Isolation, Identification, Genomic Diversity, and Antimicrobial Resistance Analysis of Streptococcus suis in Hubei Province of China from 2021 to 2023
Source: MDPI journal article supplement (doi:10.3390/microorganisms12050917), 2024-04-30
Supplement: s1 [file s1]

Table S1 The information of 19 *S. suis* isolates.

| Isolate | Year | Source                           | Location  |
|---------|------|----------------------------------|-----------|
| SS2     | 2021 | lung+lymph nodes+spleen          | Huanggang |
| SS5     | 2021 | joint fluid+pericardial effusion | Huangshi  |
| SS6     | 2021 | lung                             | Xianning  |
| SS7     | 2021 | lung                             | Huanggang |
| SS17    | 2021 | lung                             | Enshi     |
| SS24    | 2022 | lung                             | Xiaogan   |
| SS25    | 2022 | lung                             | Huangshi  |
| SS27    | 2022 | lung                             | Tianmen   |
| SS28    | 2022 | lung                             | Suizhou   |
| SS30    | 2022 | lung+pericardial effusion        | Enshi     |
| SS31    | 2022 | lung                             | Xiangyang |
| SS36    | 2022 | lung                             | Xiangyang |
| SS41    | 2022 | lung                             | Huangshi  |
| SS42    | 2022 | lung                             | Xiaogan   |
| SS44    | 2022 | lung                             | Huangshi  |
| SS46    | 2022 | lung+pericardial effusion        | Xianning  |
| SS48    | 2022 | lung                             | Suizhou   |
| SS52    | 2022 | lung                             | Huanggang |
| SS55    | 2023 | lung                             | Wuhan     |

Table S3 ICE/IME detected in 19 isolates of *S. suis* recovered in Hubei.

| Isolate | Length/bp | Type                               |
|---------|-----------|------------------------------------|
| SS2     | 182624    | Putative ICE with T4SS             |
|         | 57957     | Putative ICE with T4SS             |
|         | 29289     | Putative ICE with T4SS             |
| SS5     | 123195    | Putative ICE with T4SS             |
|         | 9681      | Putative IME                       |
| SS6     | 78164     | Putative ICE without identified DR |
| SS7     | 44803     | Putative ICE with T4SS             |
|         | 88819     | Putative ICE with T4SS             |
| SS24    | 99622     | Putative ICE with T4SS             |
|         | 115655    | Putative ICE with T4SS             |
|         | 84929     | Putative ICE with T4SS             |
|         | 45811     | Putative ICE with T4SS             |
|         | 13835     | Putative IME without identified DR |
|         | 5669      | Putative AICE with Rep and Tra     |
|         | 3605      | Putative IME without identified DR |
|         | 14929     | Putative IME                       |
| SS25    | 153559    | Putative ICE with T4SS             |
|         | 9262      | Putative IME                       |
| SS27    | 4917      | Putative IME without identified DR |
| SS28    | 127406    | Putative ICE with T4SS             |
|         | 72030     | Putative ICE with T4SS             |
| SS30    | 90035     | Putative ICE with T4SS             |
|         | 83224     | Putative ICE with T4SS             |
|         | 93027     | Putative ICE with T4SS             |
|         | 27587     | Putative IME                       |
| SS36    | 46744     | Putative ICE with T4SS             |
|         | 86205     | Putative ICE with T4SS             |
| SS41    | 3893      | Putative IME without identified DR |
| SS42    | 63662     | Putative ICE without identified DR |
|         | 6115      | Putative IME                       |
|         | 10875     | Putative IME without identified DR |
| SS44    | 46744     | Putative ICE with T4SS             |
| SS48    | 66663     | Putative ICE without identified DR |
|         | 6115      | Putative IME                       |
|         | 10875     | Putative IME without identified DR |
| SS52    | 123202    | Putative ICE with T4SS             |
|         | 89618     | Putative ICE with T4SS             |
|         | 8735      | Putative IME                       |
|         | 11399     | Putative IME without identified DR |
|         | 9681      | Putative IME                       |
| SS55    | 38331     | Putative IME without identified DR |
|         | 48259     | Putative ICE with T4SS             |

Table S4 AMR genes detected in ICE/IME of *S. suis* recovered in Hubei.

| Isolate | Type                               | AMR genes     |
|---------|------------------------------------|---------------|
| SS5     | Putative ICE with T4SS             | ermB tet(O)   |
| SS24    | Putative IME                       | ANT6 APH3 CAT |
| SS25    | Putative ICE with T4SS             | ermB tet(O)   |
| SS28    | Putative ICE with T4SS             | ermB tet(O)   |
| SS30    | Putative IME                       | ermB          |
| SS36    | Putative ICE with T4SS             | ermB tet(O)   |
| SS42    | Putative ICE without identified DR | ermB tet(O)   |
| SS52    | Putative ICE with T4SS             | ermB tet(O)   |
